# Supplementary material
Source: MDPI journal article supplement (https://www.mdpi.com/2071-1050/13/18/10345)
Supplement: s1 [file s1]

**Table S1:** Eigen value, variance and scores of the three first factors retained from the PCoA of the eight ISSR markers performed on 18 *I. aquifolium* plants.

|                           | <b>PC-1</b> | <b>PC-2</b> | <b>PC-3</b> |
|---------------------------|-------------|-------------|-------------|
| <b>1</b>                  | -0,281      | -0,043      | 0,284       |
| <b>2</b>                  | -0,287      | -0,047      | 0,117       |
| <b>3</b>                  | -0,287      | -0,047      | -0,127      |
| <b>4</b>                  | -0,287      | -0,047      | 0,133       |
| <b>5</b>                  | -0,269      | -0,114      | 0,116       |
| <b>6</b>                  | -0,287      | -0,046      | 0,205       |
| <b>7</b>                  | -0,284      | -0,046      | -0,140      |
| <b>8</b>                  | -0,264      | -0,112      | -0,341      |
| <b>9</b>                  | -0,289      | -0,048      | 0,080       |
| <b>10</b>                 | -0,284      | -0,046      | -0,090      |
| <b>11</b>                 | -0,328      | -0,063      | 0,110       |
| <b>12</b>                 | -0,278      | -0,044      | -0,098      |
| <b>13</b>                 | -0,290      | -0,047      | 0,141       |
| <b>14</b>                 | -0,284      | -0,044      | -0,184      |
| <b>15</b>                 | -0,284      | -0,046      | -0,220      |
| <b>H</b>                  | 3,048       | -1,103      | 0,005       |
| <b>IA</b>                 | -0,272      | -0,115      | 0,013       |
| <b>D</b>                  | 1,505       | 2,057       | -0,003      |
| <b>Eigen value</b>        | 12,854      | 5,516       | 0,459       |
| <b>Total variance (%)</b> | 60,82       | 26,10       | 2,17        |
| <b>Cumulative (%)</b>     | 60,82       | 86,92       | 89,09       |
